# Supplementary material for: Combined association of Presenilin-1 and Apolipoprotein E polymorphisms with maternal meiosis II error in Down syndrome births
Source: PubMed Central journal article supplement (PMC5596362; doi:10.1590/1678-4685-gmb-2016-0138), 2017-07-31
Supplement: 1415-4757-gmb-1678-4685-GMB-2016-0138-Suppl01.pdf [file 1415-4757-gmb-1678-4685-GMB-2016-0138-Suppl01.pdf]

## Supplementary Material to “Combined association of Presenilin-1 and Apolipoprotein E polymorphisms with maternal meiosis II error in Down syndrome births”

**Table S1** - *PSEN-1* genotypic and allelic frequencies in mothers of DS children.

| Subjects                                            |                                            | Genotypes |        |        | Alleles |        |
|-----------------------------------------------------|--------------------------------------------|-----------|--------|--------|---------|--------|
|                                                     |                                            | TT        | TG     | GG     | T       | G      |
| Total mothers (N = 170)                             |                                            | 0.5529    | 0.3412 | 0.1059 | 0.7235  | 0.2764 |
| Young mothers<br>(N = 86)                           |                                            | 0.5581    | 0.3488 | 0.093  | 0.7326  | 0.2674 |
| Old mothers<br>(N = 84)                             |                                            | 0.5476    | 0.3333 | 0.119  | 0.7143  | 0.2857 |
| <i>APOE</i> ε4 - positive mothers<br>(N = 51)       |                                            | 0.6078    | 0.2941 | 0.098  | 0.7549  | 0.2451 |
| <i>APOE</i> ε4 - negative mothers<br>(N = 119)      |                                            | 0.5294    | 0.3613 | 0.1092 | 0.7101  | 0.2899 |
| <i>APOE</i> ε4 - positive young mothers<br>(N = 30) |                                            | 0.6667    | 0.2667 | 0.0667 | 0.8     | 0.2    |
| <i>APOE</i> ε4 - positive old mothers<br>(N = 21)   |                                            | 0.5238    | 0.3333 | 0.1429 | 0.6905  | 0.3095 |
| <i>APOE</i> ε4 - negative young mothers<br>(N = 56) |                                            | 0.5       | 0.3929 | 0.1071 | 0.6964  | 0.3036 |
| <i>APOE</i> ε4 - negative old mothers<br>(N = 63)   |                                            | 0.5556    | 0.3333 | 0.1111 | 0.7222  | 0.2778 |
| Mothers with M I nondisjunction<br>(N = 106)        |                                            | 0.4906    | 0.3868 | 0.1226 | 0.6839  | 0.316  |
| Young mothers with M I nondisjunction<br>(N = 53)   |                                            | 0.4906    | 0.3962 | 0.1132 | 0.6887  | 0.3113 |
| Old mothers with M I nondisjunction<br>(N = 53)     |                                            | 0.4906    | 0.3774 | 0.1321 | 0.6792  | 0.3208 |
| Mothers with M II nondisjunction<br>(N = 64)        |                                            | 0.6563    | 0.2656 | 0.0781 | 0.7891  | 0.2109 |
| Young mothers with M II nondisjunction<br>(N = 33)  |                                            | 0.6667    | 0.2727 | 0.0606 | 0.803   | 0.1969 |
| Old mothers with M II nondisjunction<br>(N = 31)    |                                            | 0.6452    | 0.2581 | 0.0968 | 0.7742  | 0.2258 |
| ε4 positive<br>mothers<br>N=51                      | M I nondisjunction<br>N=29                 | 0.4483    | 0.4138 | 0.1379 | 0.6552  | 0.3448 |
|                                                     | MI nondisjunction – young mothers<br>N=16  | 0.4375    | 0.4375 | 0.125  | 0.6562  | 0.3438 |
|                                                     | MI nondisjunction – old mothers<br>N=13    | 0.4615    | 0.3846 | 0.1538 | 0.6538  | 0.3462 |
|                                                     | M II nondisjunction<br>N=22                | 0.8182    | 0.1364 | 0.0455 | 0.8864  | 0.1136 |
|                                                     | MII nondisjunction – young mothers<br>N=14 | 0.9286    | 0.0714 | 0      | 0.9643  | 0.0357 |
|                                                     | MII nondisjunction – old mothers<br>N=8    | 0.625     | 0.25   | 0.125  | 0.75    | 0.25   |
| ε4 negative<br>mothers<br>N= 119                    | M I nondisjunction<br>N=77                 | 0.5065    | 0.3766 | 0.1169 | 0.6948  | 0.3052 |
|                                                     | MI nondisjunction – young mothers<br>N=37  | 0.5135    | 0.3784 | 0.1081 | 0.7027  | 0.2973 |
|                                                     | MI nondisjunction – old mothers<br>N=40    | 0.5       | 0.375  | 0.125  | 0.6875  | 0.3125 |
|                                                     | M II nondisjunction<br>N=42                | 0.5714    | 0.3333 | 0.0952 | 0.7381  | 0.2619 |
|                                                     | MII nondisjunction – young mothers<br>N=19 | 0.4737    | 0.4211 | 0.1053 | 0.6842  | 0.3158 |

| <b>Subjects</b>                           | <b>Genotypes</b> |           |           | <b>Alleles</b> |          |
|-------------------------------------------|------------------|-----------|-----------|----------------|----------|
|                                           | <b>TT</b>        | <b>TG</b> | <b>GG</b> | <b>T</b>       | <b>G</b> |
| MII nondisjunction – old mothers<br>N= 23 | 0.6522           | 0.2609    | 0.0869    | 0.7826         | 0.2174   |

Young mothers, < 35 yrs of age; Old mothers, > 35 yrs of age
