# Supplementary material for: Combined association of Presenilin-1 and Apolipoprotein E polymorphisms with maternal meiosis II error in Down syndrome births
Source: PubMed Central journal article supplement (PMC5596362; doi:10.1590/1678-4685-gmb-2016-0138), 2017-07-31
Supplement: 1415-4757-gmb-1678-4685-GMB-2016-0138-Suppl03.pdf [file 1415-4757-gmb-1678-4685-GMB-2016-0138-Suppl03.pdf]

## Supplementary Material to “Combined association of Presenilin-1 and Apolipoprotein E polymorphisms with maternal meiosis II error in Down syndrome births”

**Table S3** - *APOE* genotypic and allelic frequencies in mothers of DS children and control mothers.

| Subjects                                                               | <i>APOE</i> Genotypes   |                         |                         |                         |                         |                         | <i>APOE</i> Alleles |              |              |
|------------------------------------------------------------------------|-------------------------|-------------------------|-------------------------|-------------------------|-------------------------|-------------------------|---------------------|--------------|--------------|
|                                                                        | $\epsilon 2/\epsilon 2$ | $\epsilon 2/\epsilon 3$ | $\epsilon 3/\epsilon 3$ | $\epsilon 3/\epsilon 4$ | $\epsilon 4/\epsilon 4$ | $\epsilon 2/\epsilon 4$ | $\epsilon 2$        | $\epsilon 3$ | $\epsilon 4$ |
| Mothers of DS children<br>(N = 170)                                    | 0.0059                  | 0.0529                  | 0.6412                  | 0.2353                  | 0.0353                  | 0.0294                  | 0.0471              | 0.7853       | 0.1676       |
| Control mothers<br>(N = 186)                                           | 0.0054                  | 0.0538                  | 0.7151                  | 0.1935                  | 0.0161                  | 0.0161                  | 0.0403              | 0.8387       | 0.121        |
| Young mothers of DS<br>children<br>(N = 86)                            | 0.0116                  | 0.0465                  | 0.593                   | 0.2558                  | 0.0465                  | 0.0465                  | 0.0581              | 0.7442       | 0.1977       |
| Young control mothers<br>(N = 93)                                      | 0                       | 0.043                   | 0.7204                  | 0.172                   | 0.0323                  | 0.0323                  | 0.0376              | 0.828        | 0.1344       |
| Old mothers of DS children<br>(N = 84)                                 | 0                       | 0.0595                  | 0.6905                  | 0.2143                  | 0.0238                  | 0.0119                  | 0.0357              | 0.8274       | 0.1369       |
| Old control mothers<br>(N = 93)                                        | 0.0108                  | 0.0645                  | 0.7097                  | 0.2151                  | 0                       | 0                       | 0.0430              | 0.8495       | 0.1075       |
| Mothers of DS children<br>with M I nondisjunction<br>(N = 106)         | 0.0094                  | 0.066                   | 0.6509                  | 0.2453                  | 0.0094                  | 0.0189                  | 0.0519              | 0.8066       | 0.1415       |
| Young mothers of DS<br>children with M I<br>nondisjunction<br>(N = 53) | 0.0189                  | 0.0755                  | 0.6038                  | 0.2642                  | 0.0189                  | 0.0189                  | 0.066               | 0.7736       | 0.1604       |
| Old mothers of DS children<br>with M I nondisjunction<br>(N = 53)      | 0                       | 0.0566                  | 0.6981                  | 0.2264                  | 0                       | 0.0189                  | 0.0377              | 0.8396       | 0.1226       |
| Mothers of DS children                                                 | 0                       | 0.0313                  | 0.625                   | 0.2188                  | 0.0781                  | 0.0469                  | 0.0391              | 0.75         | 0.2109       |

| Subjects                                                                | APOE Genotypes          |                         |                         |                         |                         |                         | APOE Alleles |              |              |
|-------------------------------------------------------------------------|-------------------------|-------------------------|-------------------------|-------------------------|-------------------------|-------------------------|--------------|--------------|--------------|
|                                                                         | $\epsilon 2/\epsilon 2$ | $\epsilon 2/\epsilon 3$ | $\epsilon 3/\epsilon 3$ | $\epsilon 3/\epsilon 4$ | $\epsilon 4/\epsilon 4$ | $\epsilon 2/\epsilon 4$ | $\epsilon 2$ | $\epsilon 3$ | $\epsilon 4$ |
| with M II nondisjunction<br>(N = 64)                                    |                         |                         |                         |                         |                         |                         |              |              |              |
| Young mothers of DS<br>children with M II<br>nondisjunction<br>(N = 33) | 0                       | 0                       | 0.5758                  | 0.2424                  | 0.0909                  | 0.0909                  | 0.0454       | 0.6969       | 0.2576       |
| Old mothers of DS children<br>with M II nondisjunction<br>(N = 31)      | 0                       | 0.0645                  | 0.6774                  | 0.1935                  | 0.0645                  | 0                       | 0.0323       | 0.8065       | 0.1613       |
| Young mothers, < 35 yrs of age; Old mothers, > 35 yrs of age            |                         |                         |                         |                         |                         |                         |              |              |              |
